# Supplementary material
Source: MDPI journal article supplement (https://www.mdpi.com/2073-4433/14/1/162)
Supplement: s1 [file s1]

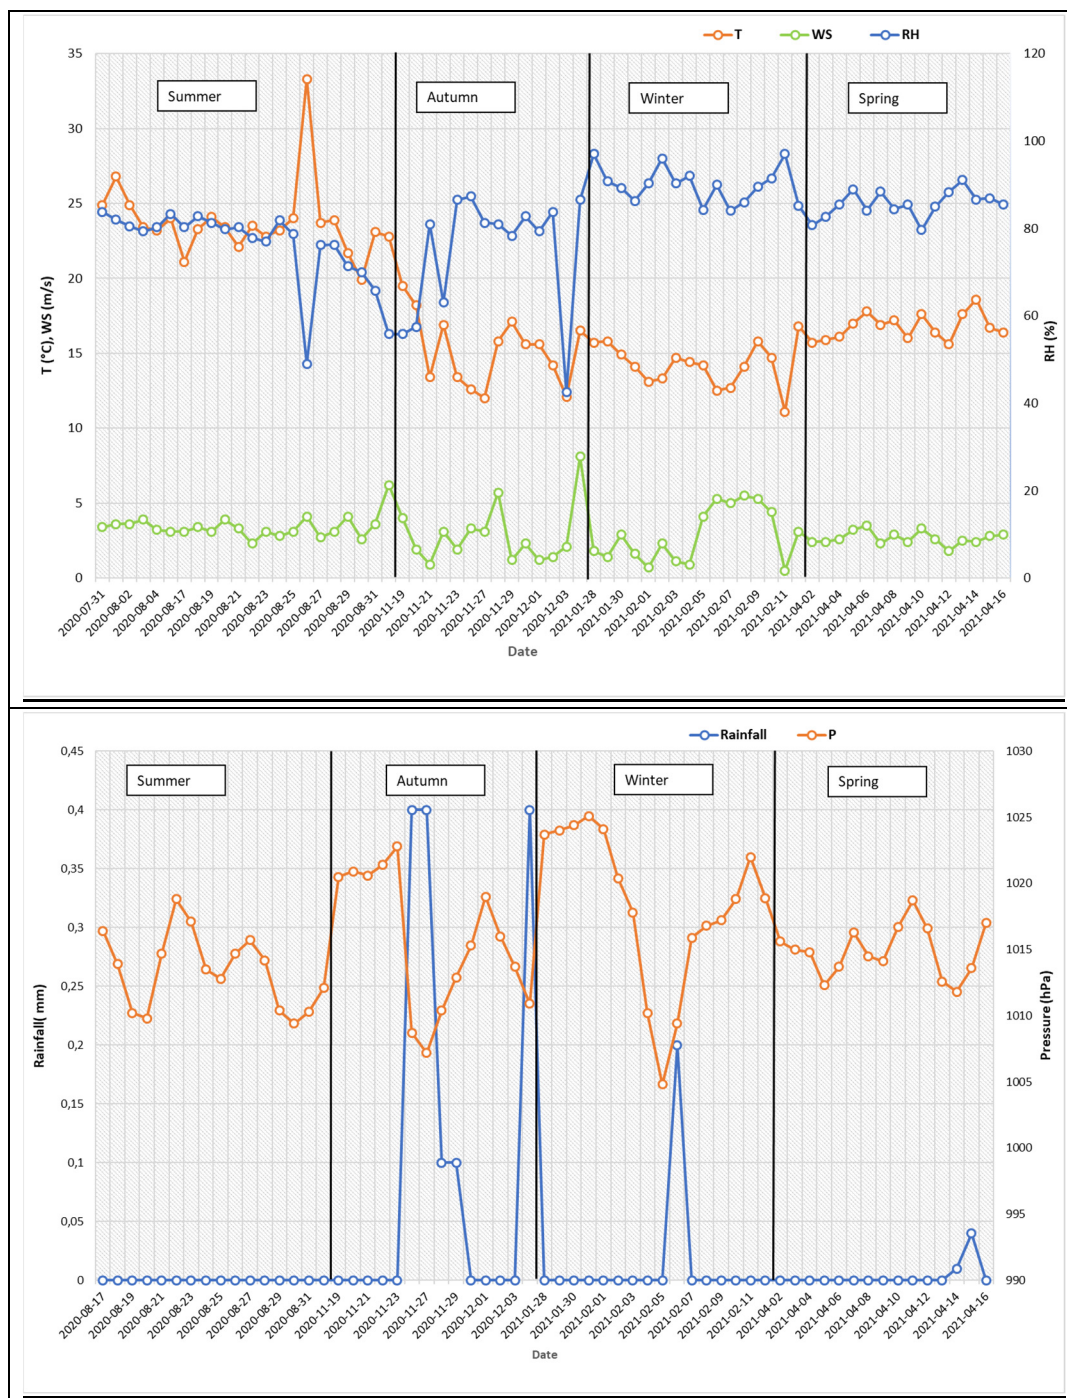

**Figure S1.** Hourly temperature ( $^{\circ}\text{C}$ ), rainfall (mm), wind speed (m/s), air pressure (hPa), and relative humidity (percent) time series for Kenitra city from mid-July 2020 to mid-February 2021, retrieved from NOAA Integrated Surface Database (ISD) meteorological data.

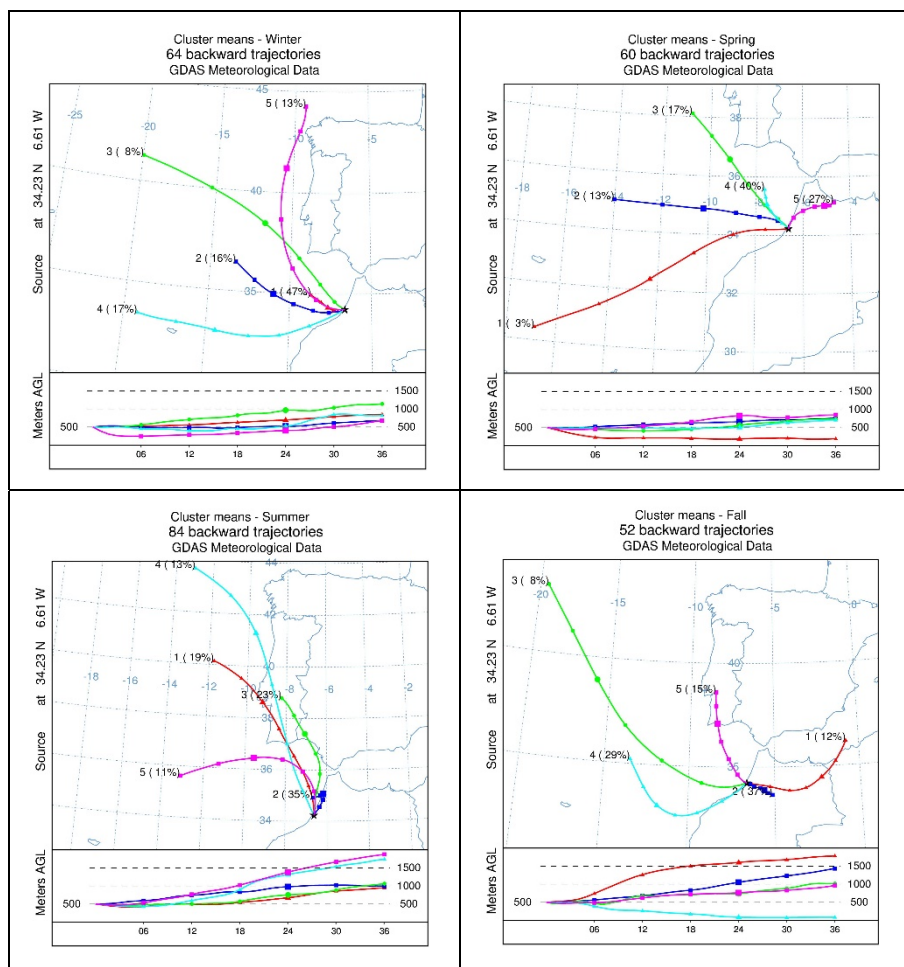

**Figure S2.** Typical back-trajectories arriving at Kenitra from mid-August 2020 to mid-February 2021 are characterized into six backward trajectory clusters and categorized by season: (a) winter (January - mid-February), (b) spring (April), (c) summer (mid-August - September), and (d) autumn (mid-November - December).

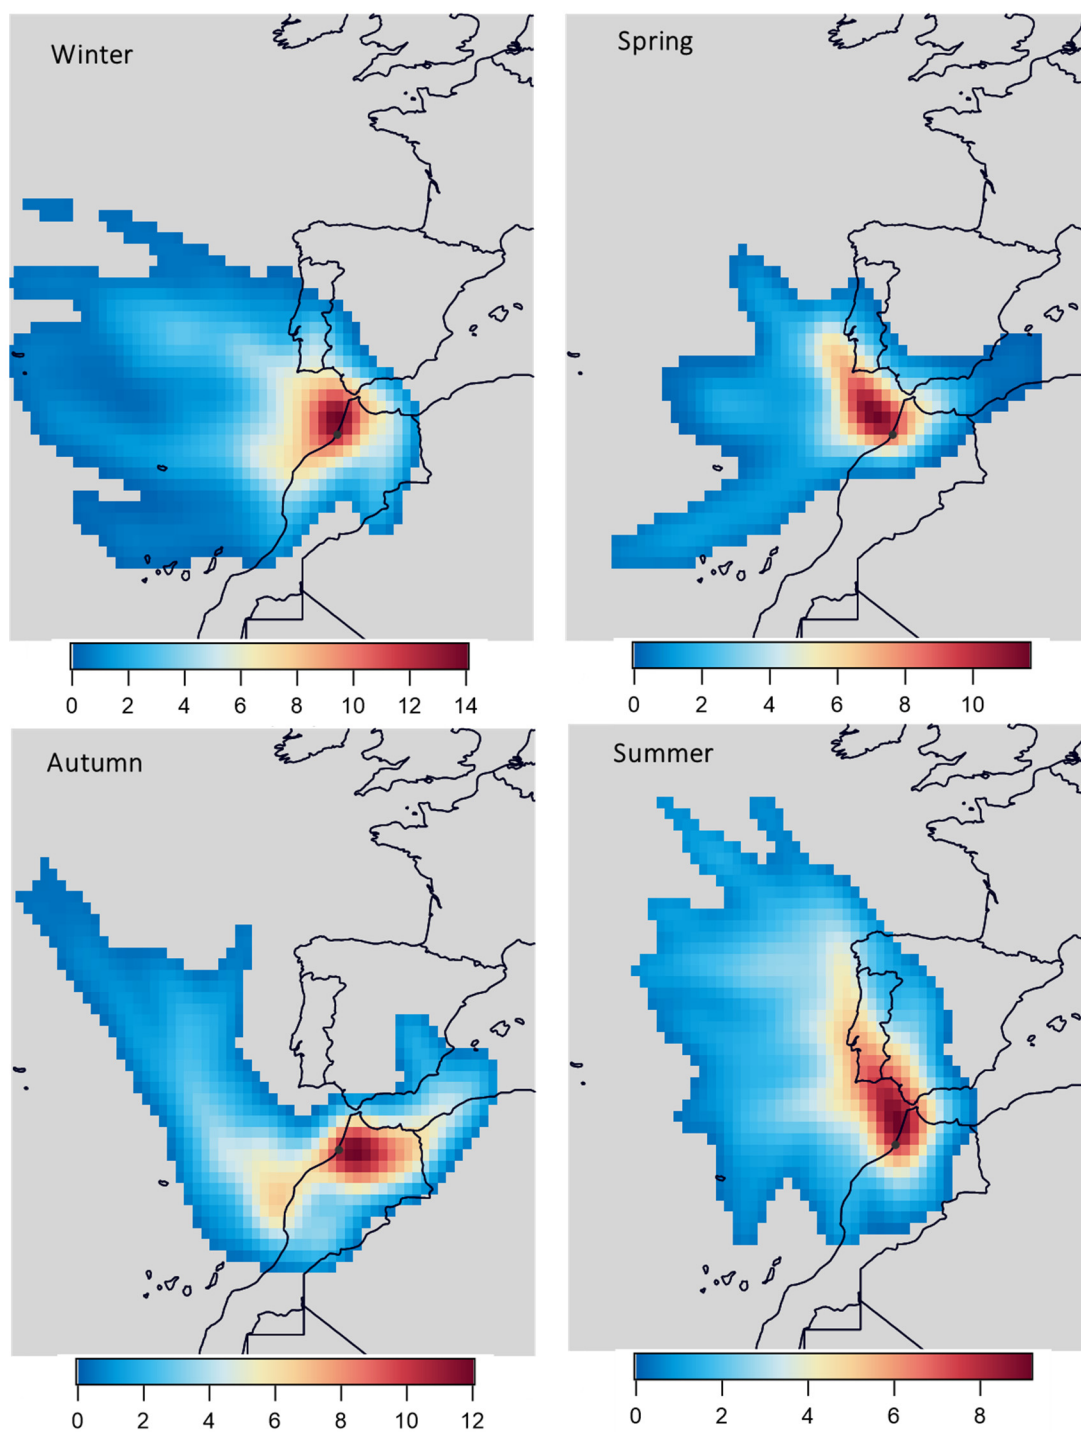

**Figure S3:** CWT maps for spring, summer, autumn and winter at Kenitra. The red areas represent mainly potential sources-areas affecting PM<sub>2.5</sub> concentrations. Scales are in  $\mu\text{g}/\text{m}^3$ .

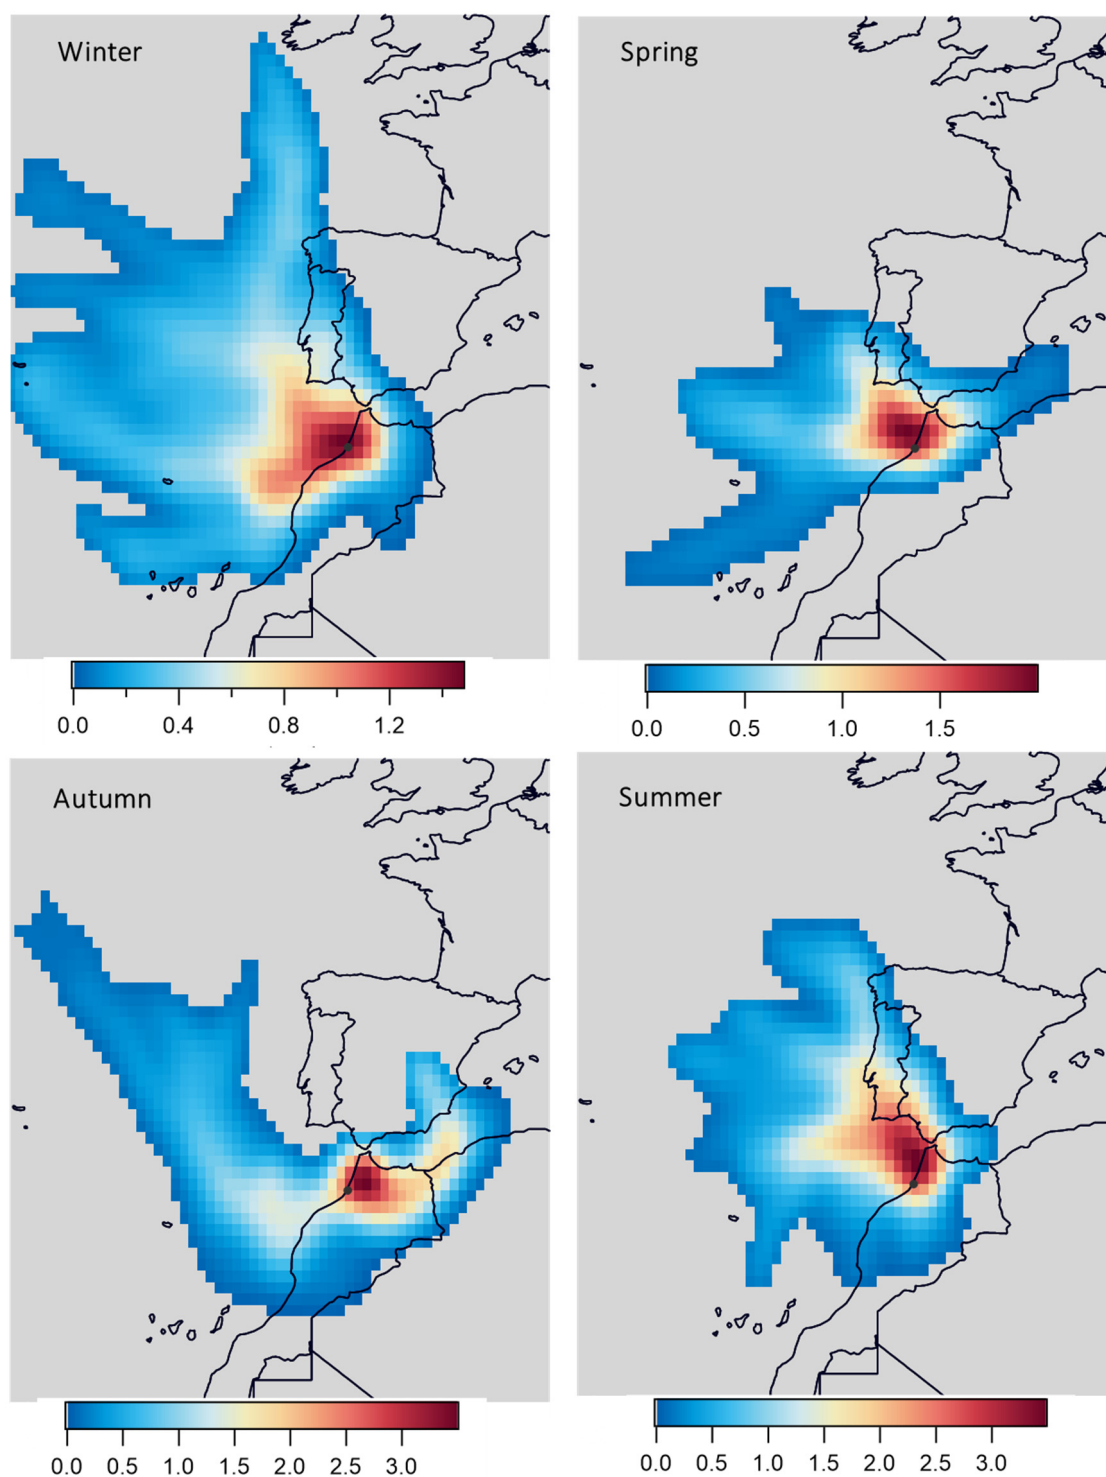

**Figure S4:** CWT maps for spring, summer, autumn and winter at Kenitra. The red areas represent mainly potential sources-areas affecting BC concentrations. Scales are in  $\mu\text{g}/\text{m}^3$ .

**Table S1.**  $\text{PM}_{10}$ ,  $\text{PM}_{2.5}$ , and BC values recorded in Kenitra compared to those reported in other locations, with an emphasis on urban-impacted areas. The table is ordered according to  $\text{PM}_{10}$  mass concentration. \*Calculated from reported  $\text{PM}_{2.5}$  and  $\text{PM}_{10}$  values; - data unavailable.

| Location | Type of location | Study period | PM measurement techniques | BC measurement techniques | BC, mass range, $\mu\text{g}/\text{m}^3$ | $\text{PM}_{2.5}$ , mass range, $\mu\text{g}/\text{m}^3$ | $\text{PM}_{10}$ , mass range, $\mu\text{g}/\text{m}^3$ | $\text{PM}_{2.5}/\text{PM}_{10}$ | Reference |
|----------|------------------|--------------|---------------------------|---------------------------|------------------------------------------|----------------------------------------------------------|---------------------------------------------------------|----------------------------------|-----------|
|----------|------------------|--------------|---------------------------|---------------------------|------------------------------------------|----------------------------------------------------------|---------------------------------------------------------|----------------------------------|-----------|

|                    |                  |                         |                                                                                                                                                                                                                              |                                                                                                                             |           |             |             |       |     |
|--------------------|------------------|-------------------------|------------------------------------------------------------------------------------------------------------------------------------------------------------------------------------------------------------------------------|-----------------------------------------------------------------------------------------------------------------------------|-----------|-------------|-------------|-------|-----|
| Patna, India       | Urban            | Jan. to Dec. 2017       | PM <sub>2.5</sub> , and PM <sub>10</sub> were recorded at five-minute intervals by using portable scattering Nephelometer (pDR-1500).                                                                                        | Micro-aethalometer (Model AE-42) and portable scattering Nephelometer (pDR-1500)                                            | 21.9      | 111.1       | 148.1       | 0.75* | [1] |
| Dhaka, Bangladesh  | Urban            | Aug. 2010 - Jul. 2012   | PM <sub>10</sub> and PM <sub>coarse</sub> samples were collected on 37-mm diameter Teflon filters using Thermo Andersen dichotomous sampler.                                                                                 | Two-wavelength transmissometer, measuring the optical absorption of the ambient PM sample at 880 nm (BC) and 370 nm (UVBC). | 7.2       | 65.1        | 130         | 0.50  | [2] |
| Khulna, Bangladesh |                  | Sept. 2010 - Feb. 2012  |                                                                                                                                                                                                                              |                                                                                                                             | 5.8       | 64.7        | 112         | 0.58  |     |
| Kenitra, Morocco   | Urban            | May 2007 - May 2008     | PM <sub>10</sub> and PM <sub>coarse</sub> samples were collected on 37-mm diameter Zefluor (Pall®) filters using Dichotomous Sampler (Model 241, Graseby Andersen).                                                          |                                                                                                                             | -         | 50.7        | 161.1       | 0.32  | [3] |
| Meknes, Morocco    | Urban            | March 2007 - April 2008 | PM <sub>10</sub> and PM <sub>coarse</sub> samples were collected on 47-mm diameter Polycarbonate filters using Gent Sampler.                                                                                                 |                                                                                                                             | -         | 28.5        | 75.4        | 0.39  | [4] |
| Barcelona, Spain   | Urban            | Jul. - Nov. 2007        | PM <sub>10</sub> and PM <sub>2.5</sub> were continuously measured (hourly basis) using optical particle counters GRIMM 1107 and 1108. PM data were corrected with 24 h gravimetric samples using high volume samplers (MCV). | Multi-Angle Absorption Photometer (MAAP, Thermo ESM Andersen Instruments)                                                   | 3.6       | 28          | 40          | 0.7*  | [5] |
| Istanbul, Turkey   | Urban traffic    | May 2016 - Dec. 2018    | PM <sub>2.5</sub> and PM <sub>10</sub> were measured using the MP101M Beta Gauge instrument (Environment SA, France).                                                                                                        | BC was measured using the MAAP instrument (Multi-Angle Absorption Photometer, Thermo-Scientific model 5012).                | 6.5 ± 3.5 | 26.8 ± 19.0 | 53.6 ± 31.5 | 0.5*  | [6] |
| Bern, Switzerland  | Urban            | 2017                    | PM <sub>2.5</sub> and PM <sub>10</sub> samples were collected on 150-mm diameter quartz fiber filters using high-volume samplers Digitel DA80.                                                                               | Coulometric carbon analysis: elemental carbon and total carbon are determined according to the VDI method.                  | 4.2       | 24.6        | 40.2        | 0.61  | [7] |
| Ashaiman, Ghana    | Semi-urban       | Feb. - May 2008         | PM <sub>10</sub> and PM <sub>coarse</sub> samples were collected on 47-mm diameter Teflon filters using Gent Sampler.                                                                                                        | Black smoke method using an EEL 43D Smoke Stain Reflectometer.                                                              | 2.8       | 23.3        | 96.6        | 0.3   | [8] |
| Krakow, Poland     | Urban background | Feb. 2020 - March 2021  | PM <sub>2.5</sub> samples were collected on Teflon filters using a low-volume sampler (Sequential 47/50-CD with Pel-tier 78 cooler, Sven Leckel GmbH, Berlin, Germany).                                                      | BC was measured using a Multi-wavelength absorption black carbon instrument (MABl).                                         | 3.5       | 18.2        | -           | -     | [9] |



|                     |       |                               |                                                                                                                                                                                         |                                                                                                                                                    |             |             |                |      |           |
|---------------------|-------|-------------------------------|-----------------------------------------------------------------------------------------------------------------------------------------------------------------------------------------|----------------------------------------------------------------------------------------------------------------------------------------------------|-------------|-------------|----------------|------|-----------|
| Kenitra,<br>Morocco | Urban | Jul. 2020<br>- Feb.<br>2021   | PM <sub>10</sub> and PM <sub>coarse</sub> sam-<br>ples were collected on<br>37-mm diameter Poly-<br>carbonate filters using<br>Dichotomous Sampler<br>(Model 241, Graseby<br>Andersen). | Offline measure-<br>ment using<br>multi-wave-<br>length absorp-<br>tion black carbon<br>instrument<br>(MABI) in PM <sub>2.5</sub><br>aerosol size. | 3.7         | 17.2        | 50.1           | 0.34 | This work |
| Tetouan,<br>Morocco | Urban | May<br>2011 -<br>Apr.<br>2012 | PM <sub>10</sub> and PM <sub>2.5</sub> were<br>collected on 47-mm<br>diameter Teflon filters<br>using PM cut-off cy-<br>clone manufactured<br>by URG (model 2000-<br>30ENB).            | A two-step com-<br>bustion method.                                                                                                                 | 3.01 - 3.22 | 13.7 - 18.6 | 25.6 -<br>31.1 | -    | [10]      |

**Table S2.** Monthly summary of the mean, standard deviation (sd), median, minimum (Min), and maximum (Max) concentrations of 6-hour meteorological parameters (T (temperature), P (pressure), RH (relative humidity), WS (wind speed) and Rainfall) between mid-July 2020 to mid-February 2021. Only the month with a number of records up to 10 valid days was used. N stands for the number of total datasets used.

| Parameter            | Season   | N  | Mean    | sd    | Median  | Max     | Min     |
|----------------------|----------|----|---------|-------|---------|---------|---------|
| <b>T (°C)</b>        |          |    |         |       |         |         |         |
|                      | February | 12 | 13.95   | 1.53  | 14.15   | 16.80   | 11.10   |
|                      | April    | 15 | 16.77   | 0.87  | 16.70   | 18.60   | 15.60   |
|                      | August   | 20 | 23.77   | 2.65  | 23.40   | 33.30   | 19.90   |
|                      | November | 10 | 15.45   | 2.52  | 15.70   | 19.50   | 12.00   |
| <b>P (hPa)</b>       |          |    |         |       |         |         |         |
|                      | February | 12 | 1016.36 | 5.59  | 1017.50 | 1024.10 | 1004.80 |
|                      | April    | 15 | 1014.89 | 1.95  | 1014.80 | 1018.70 | 1011.80 |
|                      | August   | 20 | 1013.61 | 2.91  | 1014.05 | 1018.80 | 1009.40 |
|                      | November | 10 | 1016.07 | 5.90  | 1017.90 | 1022.80 | 1007.20 |
| <b>WS (m/s)</b>      |          |    |         |       |         |         |         |
|                      | February | 12 | 3.18    | 1.99  | 3.60    | 5.50    | 0.50    |
|                      | April    | 15 | 2.67    | 0.44  | 2.60    | 3.50    | 1.80    |
|                      | August   | 20 | 3.29    | 0.49  | 3.15    | 4.10    | 2.30    |
|                      | November | 10 | 2.74    | 1.43  | 2.70    | 5.70    | 0.90    |
| <b>RH (%)</b>        |          |    |         |       |         |         |         |
|                      | February | 12 | 89.68   | 4.24  | 90.15   | 97.00   | 84.00   |
|                      | April    | 15 | 85.54   | 3.07  | 85.40   | 91.10   | 79.60   |
|                      | August   | 20 | 76.69   | 7.92  | 79.55   | 83.30   | 49.00   |
|                      | November | 10 | 75.45   | 11.94 | 81.00   | 87.30   | 55.80   |
| <b>Rainfall (mm)</b> |          |    |         |       |         |         |         |
|                      | February | 12 | 0.02    | 0.06  | 0.00    | 0.20    | 0.00    |
|                      | April    | 15 | 0.00    | 0.01  | 0.00    | 0.04    | 0.00    |
|                      | August   | 20 | 0.00    | 0.00  | 0.00    | 0.00    | 0.00    |
|                      | November | 10 | 0.10    | 0.16  | 0.00    | 0.40    | 0.00    |

## Supplementary References

1. Arif, M.; Kumar, R.; Kumar, R.; Eric, Z.; Gourav, P. Ambient Black Carbon, PM<sub>2.5</sub> and PM<sub>10</sub> at Patna: Influence of Anthropogenic Emissions and Brick Kilns. *Sci. Total Environ.* **2018**, *624*, 1387–1400, doi:10.1016/j.scitotenv.2017.12.227.
2. Begum, B.A.; Saroar, G.; Nasiruddin, M.; Randal, S.; Sivertsen, B.; Hopke, P.K. Particulate Matter and Black Carbon Monitoring at Urban Environment in Bangladesh. *Nucl. Sci. Appl.* **2014**, *23*, 1–8.

3. Tahri, M.; Benchrif, A.; Bounakhla, M.; Benyaich, F.; Noack, Y. Seasonal Variation and Risk Assessment of PM<sub>2.5</sub> and PM<sub>2.5-10</sub> in the Ambient Air of Kenitra, Morocco. *Environ. Sci. Process. Impacts* **2017**, *19*, 1427–1436, doi:10.1039/c7em00286f.
4. Ait Bouh, H.; Benyaich, F.; Bounakhla, M.; Noack, Y.; Tahri, M.; Zahry, F. Seasonal Variations of the Atmospheric Particles and Its Chemical Components in Meknes City Morocco. *J. Mater. Environ. Sci.* **2013**, *4*.
5. Pérez, N.; Pey, J.; Cusack, M.; Reche, C.; Querol, X.; Alastuey, A.; Viana, M. Variability of Particle Number, Black Carbon, and PM<sub>10</sub>, PM<sub>2.5</sub>, and PM<sub>1</sub> Levels and Speciation: Influence of Road Traffic Emissions on Urban Air Quality. *Aerosol Sci. Technol.* **2010**, *44*, 487–499, doi:10.1080/02786821003758286.
6. Şahin, Ü.A.; Onat, B.; Akin, Ö.; Ayvaz, C.; Uzun, B.; Mangır, N.; Doğan, M.; Harrison, R.M. Temporal Variations of Atmospheric Black Carbon and Its Relation to Other Pollutants and Meteorological Factors at an Urban Traffic Site in Istanbul. *Atmos. Pollut. Res.* **2020**, *11*, 1051–1062, doi:10.1016/j.apr.2020.03.009.
7. Hueglin, C.; Buchmann, B.; Weber, R.O. Long-Term Observation of Real-World Road Traffic Emission Factors on a Motorway in Switzerland. *Atmos. Environ.* **2006**, *40*, doi:10.1016/j.atmosenv.2006.03.020.
8. Dotse, S.-Q.; Asane, J.K.; Ofosu, F.G.; Aboh, I.J.K. Particulate Matter and Black Carbon Concentration Levels in Ashaiman, a Semi-Urban Area of Ghana, 2008. *Res. J. Environ. Earth Sci.* **2012**, *4*, 20–25.
9. Ryś, A.; Samek, L. Measurement Report: Determination of Black Carbon Concentration in PM<sub>2.5</sub> Fraction by Multi-Wavelength Absorption Black Carbon Instrument (MABI). *Atmos. Chem. Phys. Discuss.* **2021**, *2021*, 1–14.
10. Benchrif, A.; Guinot, B.; Bounakhla, M.; Cachier, H.; Damnati, B.; Baghdad, B. Aerosols in Northern Morocco: Input Pathways and Their Chemical Fingerprint. *Atmos. Environ.* **2018**, *174*, 140–147, doi:10.1016/j.atmosenv.2017.11.047.
